# Supplementary material for: An Exploratory Randomized Trial of SCO-792, an Enteropeptidase Inhibitor, in Patients With Type 2 Diabetes and Albuminuria
Source: PubMed Central journal article supplement — Kidney Int Rep. 2022 Oct 8;8(1):115–25. doi: 10.1016/j.ekir.2022.10.006 (PMC9831944; doi:10.1016/j.ekir.2022.10.006), 2022-10-08
Supplement: mmc1.pdf [file mmc1.pdf]

**Supplementary Material**

**An exploratory randomized trial of SCO-792, an enteropeptidase inhibitor, in patients with type 2 diabetes and albuminuria**

Tomoya Kagawa PhD,<sup>1</sup> Jun Sugama PhD,<sup>2</sup> Harunobu Nishizaki BSc,<sup>1</sup> Yusuke Moritoh PhD,<sup>2,3</sup> Masanori Watanabe MSc<sup>2</sup>

<sup>1</sup>Clinical Development Department, SCOHIA PHARMA, Inc., Kanagawa, Japan

<sup>2</sup>Drug Discovery Laboratories, SCOHIA PHARMA, Inc., Kanagawa, Japan

<sup>3</sup>Business Development Department, SCOHIA PHARMA, Inc., Kanagawa, Japan

**Running title:** Effect of SCO-792 in T2DM and albuminuria patients

**Corresponding author information:**

Yusuke Moritoh (yusuke.moritoh@scohia.com)

Masanori Watanabe (masanori.watanabe@scohia.com)

SCOHIA PHARMA, Inc.

26-1, Muraoka-higashi 2-chome, Fujisawa, Kanagawa 251-8555, Japan.

Tel: +81-70-3875-1081; Fax: +81-466-29-4427

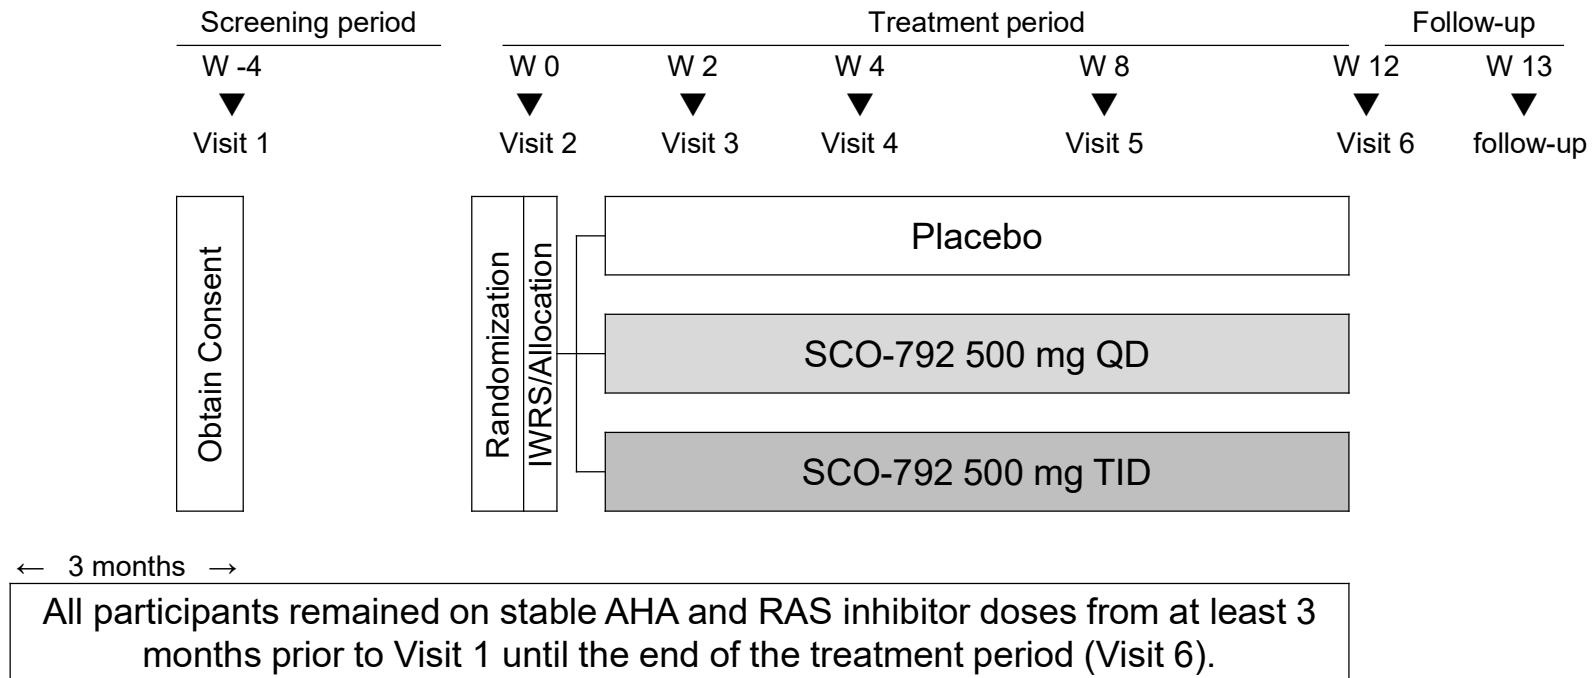

**Supplementary Figure S1. Study design**

After the screening period (-4 weeks), the enrolled subjects were randomized to either one of the three treatment groups. Stratification and randomization were performed via the Interactive Web Response System (IWRs). The study included a treatment period of 12 weeks and a follow-up period of one week. In addition to urine and blood collection, body weight, pulse rate, body temperature, 12-lead electrocardiograms (ECG), trough sitting diastolic blood pressure, and systolic blood pressure were measured at each visit.

AHA, antihyperglycemic agent; RAS, renin-angiotensin system; QD, once a day; TID, thrice a day; W, week.

**Supplementary Table S1. Concomitant medications in AHA**

| ATC Level 2<br>Preferred Term                                  | Placebo<br>(N = 15)<br>n (%) | SCO-792<br>500 mg QD<br>(N = 29)<br>n (%) | SCO-792<br>500 mg TID<br>(N = 28)<br>n (%) | All<br>SCO-792<br>(N = 57)<br>n (%) | All Participants<br>(N = 72)<br>n (%) |
|----------------------------------------------------------------|------------------------------|-------------------------------------------|--------------------------------------------|-------------------------------------|---------------------------------------|
| <b>DRUGS USED IN DIABETES</b>                                  | 15 (100.0)                   | 29 (100.0)                                | 28 (100.0)                                 | 57 (100.0)                          | 72 (100.0)                            |
| Metformin hydrochloride                                        | 11 (73.3)                    | 18 (62.1)                                 | 21 (75.0)                                  | 39 (68.4)                           | 50 (69.4)                             |
| Gliclazide                                                     | 3 (20.0)                     | 3 (10.3)                                  | 9 (32.1)                                   | 12 (21.1)                           | 15 (20.8)                             |
| Insulin Glargine                                               | 4 (26.7)                     | 5 (17.2)                                  | 4 (14.3)                                   | 9 (15.8)                            | 13 (18.1)                             |
| Empagliflozin                                                  | 3 (20.0)                     | 3 (10.3)                                  | 2 (7.1)                                    | 5 (8.8)                             | 8 (11.1)                              |
| Metformin hydrochloride; Vildagliptin                          | 1 (6.7)                      | 4 (13.8)                                  | 3 (10.7)                                   | 7 (12.3)                            | 8 (11.1)                              |
| Insulin                                                        | 1 (6.7)                      | 4 (13.8)                                  | 2 (7.1)                                    | 6 (10.5)                            | 7 (9.7)                               |
| Insulin aspart                                                 | 0                            | 3 (10.3)                                  | 2 (7.1)                                    | 5 (8.8)                             | 5 (6.9)                               |
| Insulin aspart; Insulin aspart protamine (crystalline)         | 4 (26.7)                     | 1 (3.4)                                   | 0                                          | 1 (1.8)                             | 5 (6.9)                               |
| Dulaglutide                                                    | 1 (6.7)                      | 3 (10.3)                                  | 0                                          | 3 (5.3)                             | 4 (5.6)                               |
| Glipizide                                                      | 2 (13.3)                     | 2 (6.9)                                   | 0                                          | 2 (3.5)                             | 4 (5.6)                               |
| Dapagliflozin propanediol monohydrate                          | 1 (6.7)                      | 1 (3.4)                                   | 1 (3.6)                                    | 2 (3.5)                             | 3 (4.2)                               |
| Insulin aspart; Insulin degludec                               | 1 (6.7)                      | 2 (6.9)                                   | 0                                          | 2 (3.5)                             | 3 (4.2)                               |
| Insulin Glulisine                                              | 0                            | 3 (10.3)                                  | 0                                          | 3 (5.3)                             | 3 (4.2)                               |
| Insulin human injection, isophane                              | 0                            | 0                                         | 3 (10.7)                                   | 3 (5.3)                             | 3 (4.2)                               |
| Empagliflozin; Metformin hydrochloride                         | 0                            | 2 (6.9)                                   | 0                                          | 2 (3.5)                             | 2 (2.8)                               |
| Exenatide                                                      | 0                            | 2 (6.9)                                   | 0                                          | 2 (3.5)                             | 2 (2.8)                               |
| Insulin Lispro                                                 | 0                            | 0                                         | 2 (7.1)                                    | 2 (3.5)                             | 2 (2.8)                               |
| Insulin lispro; Insulin lispro protamine suspension            | 0                            | 2 (6.9)                                   | 0                                          | 2 (3.5)                             | 2 (2.8)                               |
| Linagliptin                                                    | 1 (6.7)                      | 0                                         | 1 (3.6)                                    | 1 (1.8)                             | 2 (2.8)                               |
| Metformin hydrochloride; Sitagliptin phosphate monohydrate     | 0                            | 1 (3.4)                                   | 1 (3.6)                                    | 2 (3.5)                             | 2 (2.8)                               |
| Sitagliptin                                                    | 1 (6.7)                      | 0                                         | 1 (3.6)                                    | 1 (1.8)                             | 2 (2.8)                               |
| Sitagliptin Phosphate                                          | 0                            | 1 (3.4)                                   | 1 (3.6)                                    | 2 (3.5)                             | 2 (2.8)                               |
| Vildagliptin                                                   | 1 (6.7)                      | 0                                         | 1 (3.6)                                    | 1 (1.8)                             | 2 (2.8)                               |
| Alogliptin benzoate; Metformin hydrochloride                   | 0                            | 1 (3.4)                                   | 0                                          | 1 (1.8)                             | 1 (1.4)                               |
| Dapagliflozin propanediol monohydrate; Metformin hydrochloride | 1 (6.7)                      | 0                                         | 0                                          | 0                                   | 1 (1.4)                               |
| Dapagliflozin; Metformin                                       | 0                            | 0                                         | 1 (3.6)                                    | 1 (1.8)                             | 1 (1.4)                               |
| Insulin human                                                  | 0                            | 0                                         | 1 (3.6)                                    | 1 (1.8)                             | 1 (1.4)                               |
| Insulin isophane bovine                                        | 0                            | 1 (3.4)                                   | 0                                          | 1 (1.8)                             | 1 (1.4)                               |
| Semaglutide                                                    | 0                            | 0                                         | 1 (3.6)                                    | 1 (1.8)                             | 1 (1.4)                               |

Concomitant medication is defined as any medication taken at least once on or after the first IP administration. Medications were coded using WHODRUG GLOBAL C3 September 1, 2019.

AHA, antihyperglycemic agents; ATC, anatomical therapeutic chemical (class); QD, once a day; TID, thrice a day; WHO, World Health Organization; *N*, total number of participants in the relevant group; *n*, number of participants in each category (participants with multiple medications in each category were counted only once in each category); % = percentage of participants in each category calculated relative to the total number of participants in the relevant group.

**Supplementary Table S2. Concomitant medications in RAS inhibitors**

| ATC Level 2<br>Preferred Term                 | Placebo<br>(N = 15)<br>n (%) | SCO-792<br>500 mg QD<br>(N = 29)<br>n (%) | SCO-792<br>500 mg TID<br>(N = 28)<br>n (%) | All<br>SCO-792<br>(N = 57)<br>n (%) | All Participants<br>(N = 72)<br>n (%) |
|-----------------------------------------------|------------------------------|-------------------------------------------|--------------------------------------------|-------------------------------------|---------------------------------------|
| AGENTS ACTING ON THE RENIN-ANGIOTENSIN SYSTEM | 15 (100.0)                   | 29 (100.0)                                | 27 (96.4)#                                 | 56 (98.2)                           | 71 (98.6)                             |
| Cilazapril                                    | 4 (26.7)                     | 9 (31.0)                                  | 7 (25.0)                                   | 16 (28.1)                           | 20 (27.8)                             |
| Candesartan cilexetil                         | 1 (6.7)                      | 4 (13.8)                                  | 4 (14.3)                                   | 8 (14.0)                            | 9 (12.5)                              |
| Quinapril hydrochloride                       | 2 (13.3)                     | 4 (13.8)                                  | 3 (10.7)                                   | 7 (12.3)                            | 9 (12.5)                              |
| Losartan potassium                            | 1 (6.7)                      | 4 (13.8)                                  | 3 (10.7)                                   | 7 (12.3)                            | 8 (11.1)                              |
| Irbesartan                                    | 1 (6.7)                      | 1 (3.4)                                   | 2 (7.1)                                    | 3 (5.3)                             | 4 (5.6)                               |
| Amlodipine besilate; Telmisartan              | 0                            | 3 (10.3)                                  | 0                                          | 3 (5.3)                             | 3 (4.2)                               |
| Perindopril Erbumine                          | 1 (6.7)                      | 0                                         | 2 (7.1)                                    | 2 (3.5)                             | 3 (4.2)                               |
| Telmisartan                                   | 0                            | 2 (6.9)                                   | 1 (3.6)                                    | 3 (5.3)                             | 3 (4.2)                               |
| Cilazapril;Hydrochlorothiazide                | 1 (6.7)                      | 0                                         | 1 (3.6)                                    | 1 (1.8)                             | 2 (2.8)                               |
| Olmesartan Medoxomil                          | 1 (6.7)                      | 0                                         | 1 (3.6)                                    | 1 (1.8)                             | 2 (2.8)                               |
| Perindopril Arginine                          | 0                            | 1 (3.4)                                   | 1 (3.6)                                    | 2 (3.5)                             | 2 (2.8)                               |
| Amlodipine besilate; Perindopril Arginine     | 0                            | 1 (3.4)                                   | 0                                          | 1 (1.8)                             | 1 (1.4)                               |
| Amlodipine besilate; Valsartan                | 1 (6.7)                      | 0                                         | 0                                          | 0                                   | 1 (1.4)                               |
| Hydrochlorothiazide; Irbesartan               | 1 (6.7)                      | 0                                         | 0                                          | 0                                   | 1 (1.4)                               |
| Hydrochlorothiazide; Quinapril hydrochloride  | 0                            | 0                                         | 1 (3.6)                                    | 1 (1.8)                             | 1 (1.4)                               |
| Lisinopril dihydrate                          | 1 (6.7)                      | 0                                         | 0                                          | 0                                   | 1 (1.4)                               |
| Ramipril                                      | 0                            | 1 (3.4)                                   | 0                                          | 1 (1.8)                             | 1 (1.4)                               |
| Valsartan                                     | 0                            | 0                                         | 1 (3.6)                                    | 1 (1.8)                             | 1 (1.4)                               |

Concomitant medication is defined as any medication taken at least once on or after the first IP administration. Medications were coded using WHODRUG GLOBAL C3 September 1, 2019.

#: Participant 201-013 in the SCO-792 500 mg TID group was not reported on the electronic case report form page as having received an RAS inhibitor; however, all participants received RAS inhibitors throughout the study, in line with inclusion criterion #5 of the protocol.

RAS, renin-angiotensin system; ATC, anatomical therapeutic chemical (class); QD, once a day; TID, thrice a day; WHO, World Health Organization; N, total number of participants in the relevant group; n, number of participants in each category (participants with multiple medications in each category were counted only once in each category); % = percentage of participants in each category calculated relative to the total number of participants in the relevant group.

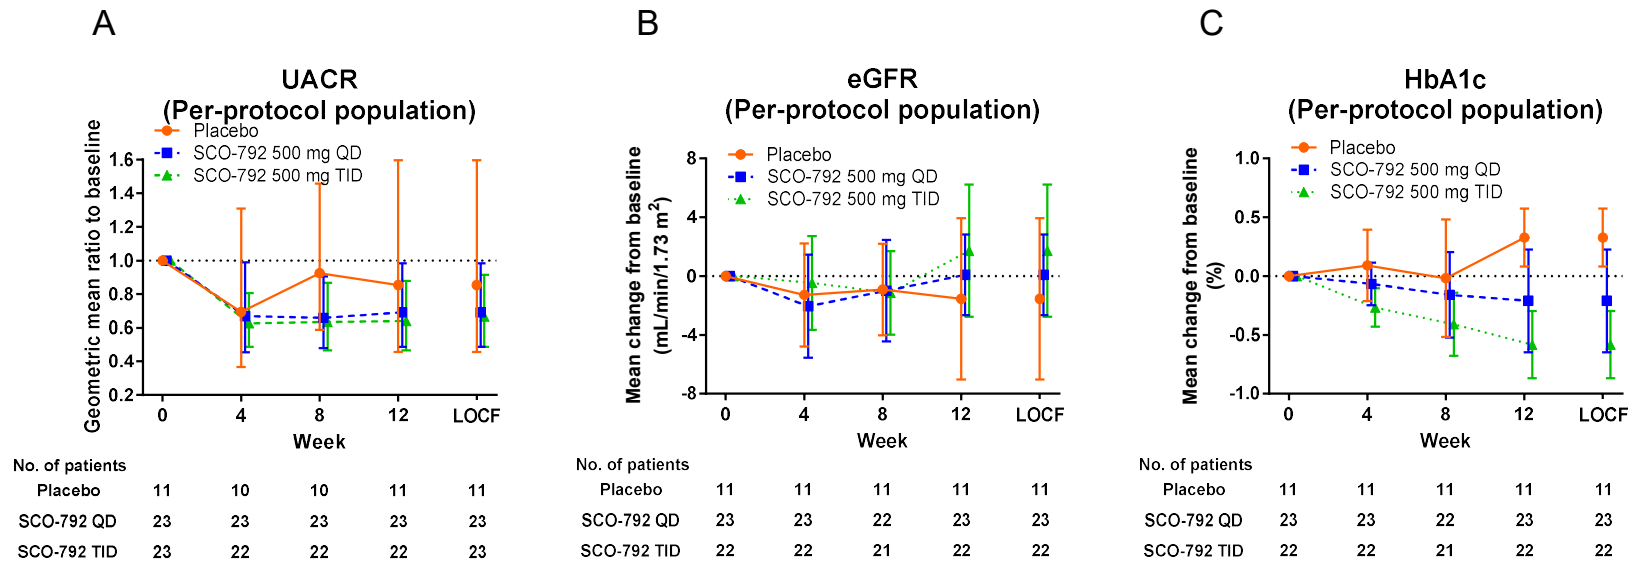

**Supplementary Figure S2. UACR, eGFR, and HbA1c (per-protocol population)**

Geometric mean ratio in UACR from baseline (A), mean change in eGFR from baseline (B), and Mean change in HbA1c from baseline (C). Values are presented as mean  $\pm$  95% CI. The number of patients is indicated in the figure.

UACR, urine albumin-creatinine ratio; eGFR, estimated glomerular filtration rate; QD, once a day; TID, thrice a day; LOCF, last observation carried forward; CI, confidence interval.

**Supplementary Table S3. Treatment differences in change in UACR from baseline to end of treatment (per-protocol population)**

|                                  | Per-protocol population |                      |                       |
|----------------------------------|-------------------------|----------------------|-----------------------|
|                                  | Placebo                 | SCO-792<br>500 mg QD | SCO-792<br>500 mg TID |
| <i>n</i>                         | 11                      | 23                   | 23                    |
| Geo LS Mean                      | 0.85                    | 0.65                 | 0.68                  |
| (95% CI)                         | (0.53, 1.36)            | (0.46, 0.90)         | (0.49, 0.94)          |
| <i>p</i> -value <sup>a</sup>     | 0.4839                  | 0.0114               | 0.0218                |
| Geo LS Mean Ratio (ref. placebo) |                         | 0.76                 | 0.80                  |
| (95% CI)                         |                         | (0.43, 1.36)         | (0.45, 1.42)          |
| <i>p</i> -value <sup>b</sup>     |                         | 0.3495               | 0.4411                |

a. value of the adjusted geometric least squares (LS) mean of each treatment group against 1 using *t*-test.

b. *p*-value of geometric LS mean ratio of each treatment group to placebo.

Geometric mean, geometric LS mean diff, 95% CI, and *p*-value were determined using the ANCOVA model of log-transformed UACR values.

UACR, urine albumin-creatinine ratio; QD, once a day; TID, thrice a day; *n* = number of participants in each category; Geo, geometric; CI, confidence interval.

**Supplementary Table S4. Changes in UACR from baseline to end of treatment (pre-defined setting)**

|                                              | Intent-to-treat population |                      |                       | Per-protocol population |                      |                       |
|----------------------------------------------|----------------------------|----------------------|-----------------------|-------------------------|----------------------|-----------------------|
|                                              | Placebo                    | SCO-792<br>500 mg QD | SCO-792<br>500 mg TID | Placebo                 | SCO-792<br>500 mg QD | SCO-792<br>500 mg TID |
| <i>n</i>                                     | 14                         | 29                   | 26                    | 11                      | 23                   | 22                    |
| Geo LS Mean<br>(95% CI)                      | 0.86<br>(0.60, 1.23)       | 0.76<br>(0.59, 0.98) | 0.80<br>(0.62, 1.04)  | 0.85<br>(0.55, 1.31)    | 0.68<br>(0.50, 0.92) | 0.77<br>(0.56, 1.04)  |
| <i>p</i> -value <sup>a</sup>                 | 0.4069                     | 0.0323               | 0.0957                | 0.4435                  | 0.0140               | 0.0903                |
| Geo LS Mean Ratio (ref. placebo)<br>(95% CI) |                            | 0.88<br>(0.57, 1.36) | 0.93<br>(0.60, 1.45)  |                         | 0.80<br>(0.47, 1.36) | 0.91<br>(0.53, 1.54)  |
| <i>p</i> -value <sup>b</sup>                 |                            | 0.5627               | 0.7438                |                         | 0.4059               | 0.7114                |

This analysis was conducted using the pre-defined setting for UACR analysis, which excluded urinary albumin values that exceeded the lower limit of assay detection. Analysis using lower limit urinary albumin value (when the value shown was below the lower limit) and upper limit urinary albumin value (when the value shown was over the upper limit) was conducted for the analysis of UACR changes, and the results are presented in Table 3.

a. value of the adjusted geometric least squares (LS) mean of each treatment group against 1 using *t*-test.

b. *p*-value of geometric LS mean ratio of each treatment group to placebo.

Geometric mean, geometric LS mean diff, 95% CI, and *p*-value were determined using the ANCOVA model of log-transformed UACR values.

UACR, urine albumin-creatinine ratio; QD, once a day; TID, thrice a day; *n* = number of participants in each category; Geo, geometric; CI, confidence interval.

**Supplementary Table S5. Changes in secondary and exploratory endpoints (per-protocol population)**

|                                                                   | Per-protocol population |                                  |                                   |
|-------------------------------------------------------------------|-------------------------|----------------------------------|-----------------------------------|
|                                                                   | Placebo<br>(N = 11)     | SCO-792<br>500 mg QD<br>(N = 23) | SCO-792<br>500 mg TID<br>(N = 22) |
| eGFR (mL/min/1.73 m <sup>2</sup> )                                |                         |                                  |                                   |
| Change to week 12                                                 |                         |                                  |                                   |
| n                                                                 | 11                      | 23                               | 22                                |
| Mean                                                              | -1.5                    | 0.1                              | 1.7                               |
| (95% CI)                                                          | (-7.0, 4.0)             | (-2.7, 2.8)                      | (-2.8, 6.2)                       |
| SD                                                                | 8.19                    | 6.35                             | 10.14                             |
| Urinary albumin-to-creatinine ratio response rate ≥ 30% reduction |                         |                                  |                                   |
| n                                                                 | 2                       | 7                                | 7                                 |
| %                                                                 | 18.2                    | 30.4                             | 31.8                              |
| (95% CI)                                                          | (2.28, 51.78)           | (13.21, 52.92)                   | (13.86, 54.87)                    |
| Hemoglobin A1c (%)                                                |                         |                                  |                                   |
| Change to week 12                                                 |                         |                                  |                                   |
| n                                                                 | 11                      | 23                               | 22                                |
| Mean                                                              | 0.33                    | -0.21                            | -0.58                             |
| (95% CI)                                                          | (0.08, 0.57)            | (-0.65, 0.23)                    | (-0.87, -0.30)<br>*               |
| SD                                                                | 0.366                   | 1.011                            | 0.644                             |
| Fasting plasma glucose (mmol/L)                                   |                         |                                  |                                   |
| Change to week 12                                                 |                         |                                  |                                   |
| n                                                                 | 10                      | 21                               | 21                                |
| Mean                                                              | 0.69                    | -0.80                            | -1.33                             |
| (95% CI)                                                          | (-2.90, 4.28)           | (-1.95, 0.34)                    | (-2.45, -0.21)<br>*               |
| SD                                                                | 5.022                   | 2.523                            | 2.458                             |
| Fasting insulin (mU/L)                                            |                         |                                  |                                   |
| Change to week 12                                                 |                         |                                  |                                   |
| n                                                                 | 10                      | 19                               | 21                                |
| Mean                                                              | 3.04                    | -7.45                            | 3.39                              |
| (95% CI)                                                          | (-22.18, 28.26)         | (-19.87, 4.98)                   | (-1.11, 7.88)                     |
| SD                                                                | 35.252                  | 25.782                           | 9.880                             |
| HOMA-IR                                                           |                         |                                  |                                   |
| Change to week 12                                                 |                         |                                  |                                   |
| n                                                                 | 11                      | 21                               | 22                                |
| Mean                                                              | 3.475                   | -4.897                           | -0.690                            |
| (95% CI)                                                          | (-19.991, 26.942)       | (-12.314, 2.520)                 | (-2.933, 1.552)                   |
| SD                                                                | 34.9297                 | 16.2945                          | 5.0574                            |
| Body weight (kg)                                                  |                         |                                  |                                   |
| % change to week 12                                               |                         |                                  |                                   |
| n                                                                 | 11                      | 23                               | 22                                |
| Mean                                                              | 1.240                   | -0.319                           | -0.060                            |
| (95% CI)                                                          | (-0.209, 2.689)         | (-1.490, 0.852)                  | (-1.143, 1.023)                   |
| SD                                                                | 2.1567                  | 2.7078                           | 2.4432                            |
| Urinary protein-to-creatinine ratio (mg/gCr)                      |                         |                                  |                                   |
| Week 12                                                           |                         |                                  |                                   |
| n                                                                 | 11                      | 23                               | 21                                |
| Geo Mean                                                          | 0.900                   | 0.778                            | 0.844                             |
| (95% CI)                                                          | (0.541, 1.498)          | (0.578, 1.048)                   | (0.688, 1.036)                    |
| Geo SD                                                            | 2.1347                  | 1.9897                           | 1.5660                            |
| Systolic blood pressure (mmHg)                                    |                         |                                  |                                   |
| Change to week 12                                                 |                         |                                  |                                   |
| n                                                                 | 11                      | 23                               | 22                                |
| Mean                                                              | 7.5                     | 0.1                              | -3.7                              |
| (95% CI)                                                          | (-0.5, 15.4)            | (-4.6, 4.8)                      | (-8.0, 0.6)                       |
| SD                                                                | 11.83                   | 10.80                            | 9.65                              |



|                                            |                   |                  |                   |
|--------------------------------------------|-------------------|------------------|-------------------|
| Diastolic blood pressure (mmHg)            |                   |                  |                   |
| Change to week 12                          |                   |                  |                   |
| <i>n</i>                                   | 11                | 23               | 22                |
| Mean                                       | -0.4              | -1.1             | -1.6              |
| (95% CI)                                   | (-7.7, 7.0)       | (-4.1, 1.9)      | (-4.0, 0.8)       |
| SD                                         | 10.96             | 6.97             | 5.50              |
| High-sensitivity C-reactive protein (mg/L) |                   |                  |                   |
| Change to week 12                          |                   |                  |                   |
| <i>n</i>                                   | 11                | 23               | 22                |
| Mean                                       | 2.992             | -4.187           | 1.870             |
| (95% CI)                                   | (-3.822, 9.805)   | (-10.869, 2.494) | (-1.886, 5.627)   |
| SD                                         | 10.1420           | 15.4507          | 8.4726            |
| Triglycerides (mmol/L)                     |                   |                  |                   |
| % change to week 12                        |                   |                  |                   |
| <i>n</i>                                   | 11                | 23               | 22                |
| Mean                                       | 24.967            | 17.013           | 17.082            |
| (95% CI)                                   | (-14.307, 64.240) | (-7.743, 41.769) | (-1.861, 36.024)  |
| SD                                         | 58.4589           | 57.2489          | 42.7228           |
| Low-density lipoproteins (mmol/L)          |                   |                  |                   |
| % change to week 12                        |                   |                  |                   |
| <i>n</i>                                   | 11                | 23               | 22                |
| Mean                                       | 6.553             | -1.859           | 34.523            |
| (95% CI)                                   | (-5.994, 19.100)  | (-9.972, 6.253)  | (-15.871, 84.917) |
| SD                                         | 18.6770           | 18.7602          | 113.6607          |
| High-density lipoprotein (mmol/L)          |                   |                  |                   |
| % Change to week 12                        |                   |                  |                   |
| <i>n</i>                                   | 11                | 23               | 22                |
| Mean                                       | 1.585             | 1.694            | -2.569            |
| (95% CI)                                   | (-6.868, 10.038)  | (-6.085, 9.472)  | (-7.376, 2.238)   |
| SD                                         | 12.5822           | 17.9876          | 10.8409           |
| Valine (µmol/L)                            |                   |                  |                   |
| Change to week 12                          |                   |                  |                   |
| <i>n</i>                                   | 6                 | 18               | 21                |
| Mean                                       | 12.8              | 4.4              | -7.7              |
| (95% CI)                                   | (-58.7, 84.3)     | (-32.7, 41.5)    | (-39.1, 23.7)     |
| SD                                         | 68.13             | 74.59            | 68.97             |
| Leucine (µmol/L)                           |                   |                  |                   |
| Change to week 12                          |                   |                  |                   |
| <i>n</i>                                   | 6                 | 18               | 21                |
| Mean                                       | 11.2              | -7.7             | -8.0              |
| (95% CI)                                   | (-39.4, 61.7)     | (-28.2, 12.9)    | (-22.6, 6.6)      |
| SD                                         | 48.18             | 41.35            | 32.04             |
| Isoleucine (µmol/L)                        |                   |                  |                   |
| Change to week 12                          |                   |                  |                   |
| <i>n</i>                                   | 6                 | 18               | 21                |
| Mean                                       | 8.5               | 0.6              | -0.9              |
| (95% CI)                                   | (-26.3, 43.3)     | (-11.0, 12.2)    | (-10.4, 8.6)      |
| SD                                         | 33.12             | 23.35            | 20.80             |

QD, once a day; TID, thrice a day; *N*, total number of participants in the relevant group; eGFR, estimated glomerular filtration rate; *n*, number of participants in each category; CI, confidence interval; SD, standard deviation; Geo, geometric.

HOMA-IR = fasting insulin level (µU/mL) × fasting blood glucose level (mg/dL) / 405.

\*95% CI did not cross zero at the indicated measurement.

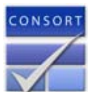

## CONSORT 2010 checklist of information to include when reporting a randomised trial\*

| Section/Topic                    | Item No | Checklist item                                                                                                                                                                              | Reported on page No |
|----------------------------------|---------|---------------------------------------------------------------------------------------------------------------------------------------------------------------------------------------------|---------------------|
| <b>Title and abstract</b>        |         |                                                                                                                                                                                             |                     |
|                                  | 1a      | Identification as a randomised trial in the title                                                                                                                                           | 1                   |
|                                  | 1b      | Structured summary of trial design, methods, results, and conclusions (for specific guidance see CONSORT for abstracts)                                                                     | 2                   |
| <b>Introduction</b>              |         |                                                                                                                                                                                             |                     |
| Background and objectives        | 2a      | Scientific background and explanation of rationale                                                                                                                                          | 4-5                 |
|                                  | 2b      | Specific objectives or hypotheses                                                                                                                                                           | 4-5                 |
| <b>Methods</b>                   |         |                                                                                                                                                                                             |                     |
| Trial design                     | 3a      | Description of trial design (such as parallel, factorial) including allocation ratio                                                                                                        | 6-7                 |
|                                  | 3b      | Important changes to methods after trial commencement (such as eligibility criteria), with reasons                                                                                          | NA                  |
| Participants                     | 4a      | Eligibility criteria for participants                                                                                                                                                       | 7                   |
|                                  | 4b      | Settings and locations where the data were collected                                                                                                                                        | 6                   |
| Interventions                    | 5       | The interventions for each group with sufficient details to allow replication, including how and when they were actually administered                                                       | 6-7                 |
| Outcomes                         | 6a      | Completely defined pre-specified primary and secondary outcome measures, including how and when they were assessed                                                                          | 8                   |
|                                  | 6b      | Any changes to trial outcomes after the trial commenced, with reasons                                                                                                                       | NA                  |
| Sample size                      | 7a      | How sample size was determined                                                                                                                                                              | 6, 9                |
|                                  | 7b      | When applicable, explanation of any interim analyses and stopping guidelines                                                                                                                | NA                  |
| Randomisation:                   |         |                                                                                                                                                                                             |                     |
| Sequence generation              | 8a      | Method used to generate the random allocation sequence                                                                                                                                      | 6-7                 |
|                                  | 8b      | Type of randomisation; details of any restriction (such as blocking and block size)                                                                                                         | 6-7                 |
| Allocation concealment mechanism | 9       | Mechanism used to implement the random allocation sequence (such as sequentially numbered containers), describing any steps taken to conceal the sequence until interventions were assigned | 6-7                 |
| Implementation                   | 10      | Who generated the random allocation sequence, who enrolled participants, and who assigned participants to interventions                                                                     | 6-7                 |
| Blinding                         | 11a     | If done, who was blinded after assignment to interventions (for example, participants, care providers, those assessing outcomes) and how                                                    | 6-7                 |

|                                                      |     |                                                                                                                                                   |                                        |
|------------------------------------------------------|-----|---------------------------------------------------------------------------------------------------------------------------------------------------|----------------------------------------|
| Statistical methods                                  | 11b | If relevant, description of the similarity of interventions                                                                                       | NA                                     |
|                                                      | 12a | Statistical methods used to compare groups for primary and secondary outcomes                                                                     | 9-10                                   |
|                                                      | 12b | Methods for additional analyses, such as subgroup analyses and adjusted analyses                                                                  | NA                                     |
| <b>Results</b>                                       |     |                                                                                                                                                   |                                        |
| Participant flow (a diagram is strongly recommended) | 13a | For each group, the numbers of participants who were randomly assigned, received intended treatment, and were analysed for the primary outcome    | 10<br>Figure 1                         |
|                                                      | 13b | For each group, losses and exclusions after randomisation, together with reasons                                                                  | 10<br>Figure 1                         |
| Recruitment                                          | 14a | Dates defining the periods of recruitment and follow-up                                                                                           | 6                                      |
|                                                      | 14b | Why the trial ended or was stopped                                                                                                                | NA                                     |
| Baseline data                                        | 15  | A table showing baseline demographic and clinical characteristics for each group                                                                  | Table 1                                |
| Numbers analysed                                     | 16  | For each group, number of participants (denominator) included in each analysis and whether the analysis was by original assigned groups           | 6<br>Figure 1                          |
| Outcomes and estimation                              | 17a | For each primary and secondary outcome, results for each group, and the estimated effect size and its precision (such as 95% confidence interval) | 10-13<br>Table 2<br>Table 3<br>Table 4 |
|                                                      | 17b | For binary outcomes, presentation of both absolute and relative effect sizes is recommended                                                       | Figures 2,3,4<br>NA                    |
| Ancillary analyses                                   | 18  | Results of any other analyses performed, including subgroup analyses and adjusted analyses, distinguishing pre-specified from exploratory         | NA                                     |
| Harms                                                | 19  | All important harms or unintended effects in each group (for specific guidance see CONSORT for harms)                                             | NA                                     |
| <b>Discussion</b>                                    |     |                                                                                                                                                   |                                        |
| Limitations                                          | 20  | Trial limitations, addressing sources of potential bias, imprecision, and, if relevant, multiplicity of analyses                                  | 15                                     |
| Generalisability                                     | 21  | Generalisability (external validity, applicability) of the trial findings                                                                         | 13-15                                  |
| Interpretation                                       | 22  | Interpretation consistent with results, balancing benefits and harms, and considering other relevant evidence                                     | 13-15                                  |
| <b>Other information</b>                             |     |                                                                                                                                                   |                                        |
| Registration                                         | 23  | Registration number and name of trial registry                                                                                                    | 6, 16                                  |
| Protocol                                             | 24  | Where the full trial protocol can be accessed, if available                                                                                       | NA                                     |
| Funding                                              | 25  | Sources of funding and other support (such as supply of drugs), role of funders                                                                   | 16                                     |

\*We strongly recommend reading this statement in conjunction with the CONSORT 2010 Explanation and Elaboration for important clarifications on all the items. If relevant, we also recommend reading CONSORT extensions for cluster randomised trials, non-inferiority and equivalence trials, non-pharmacological treatments, herbal interventions, and pragmatic trials. Additional extensions are forthcoming: for those and for up to date references relevant to this checklist, see [www.consort-statement.org](http://www.consort-statement.org).
